# Supplementary material for: Dioscin-Mediated Autophagy Alleviates MPP+-Induced Neuronal Degeneration: An In Vitro Parkinson’s Disease Model
Source: MDPI journal article supplement (doi:10.3390/molecules27092827), 2022-04-29

## Dioscin-mediated autophagy alleviates MPP<sup>+</sup>-induced neuronal degeneration: an *in vitro* Parkinson's disease model

Shofiul Azam <sup>1</sup>, Md. Ezazul Haque <sup>1</sup>, Duk-Yeon Cho <sup>1</sup>, JoonSoo Kim <sup>1</sup>, Md. Jakaria <sup>3</sup>, In-Su Kim <sup>2</sup>, Dong-Kug Choi <sup>1, 2\*</sup>

<sup>1</sup> Department of Applied Life Science & Integrated Bioscience, Graduate School, BK21 Program, Konkuk University, Chungju 27478, Korea; shofiul\_azam@hotmail.com (SA); mdezazulhaque@yahoo.com (MEH); [whejrdus10@kku.ac.kr](mailto:whejrdus10@kku.ac.kr) (DYC); kgfdkr@gmail.com (JSK)

<sup>2</sup> Department of Integrated Bioscience & Biotechnology, College of Biomedical and Health Science, Research Institute of Inflammatory Disease (RID), Konkuk University, Chungju 27478, Korea; kis5497@hanmail.net (ISK)

<sup>3</sup> Melbourne Dementia Research Centre, The Florey Institute of Neuroscience and Mental Health, The University of Melbourne, Parkville, VIC, 3052, Australia; md.jakaria@florey.edu.au (MJ)

\*Correspondence: choidk@kku.ac.kr; Tel.: +82-43-840-3610; Fax: +82-43-840-3872

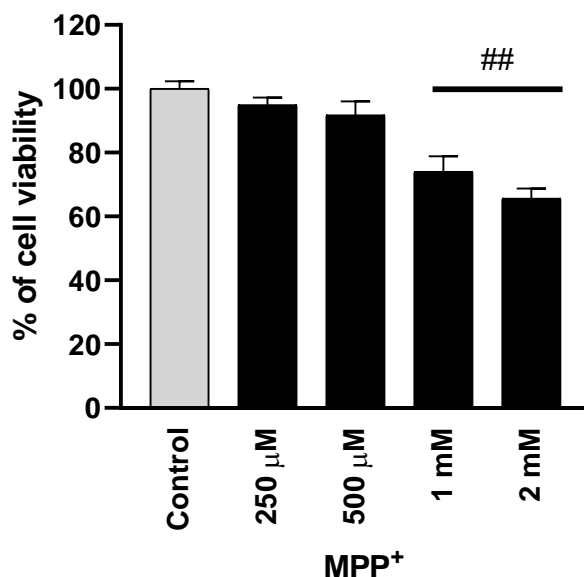

**Figure S1: Dose-dependent toxicity of MPP<sup>+</sup> in SH-SY5Y cells at 24 h.** For dose determination of MPP<sup>+</sup>, different doses of MPP<sup>+</sup> was treated to SH-SY5Y cells for 24 h; n=3; ##p<0.001 compared between non-treated (control) vs treatment (MPP<sup>+</sup>), statistical analysis was done using one-way ANOVA.

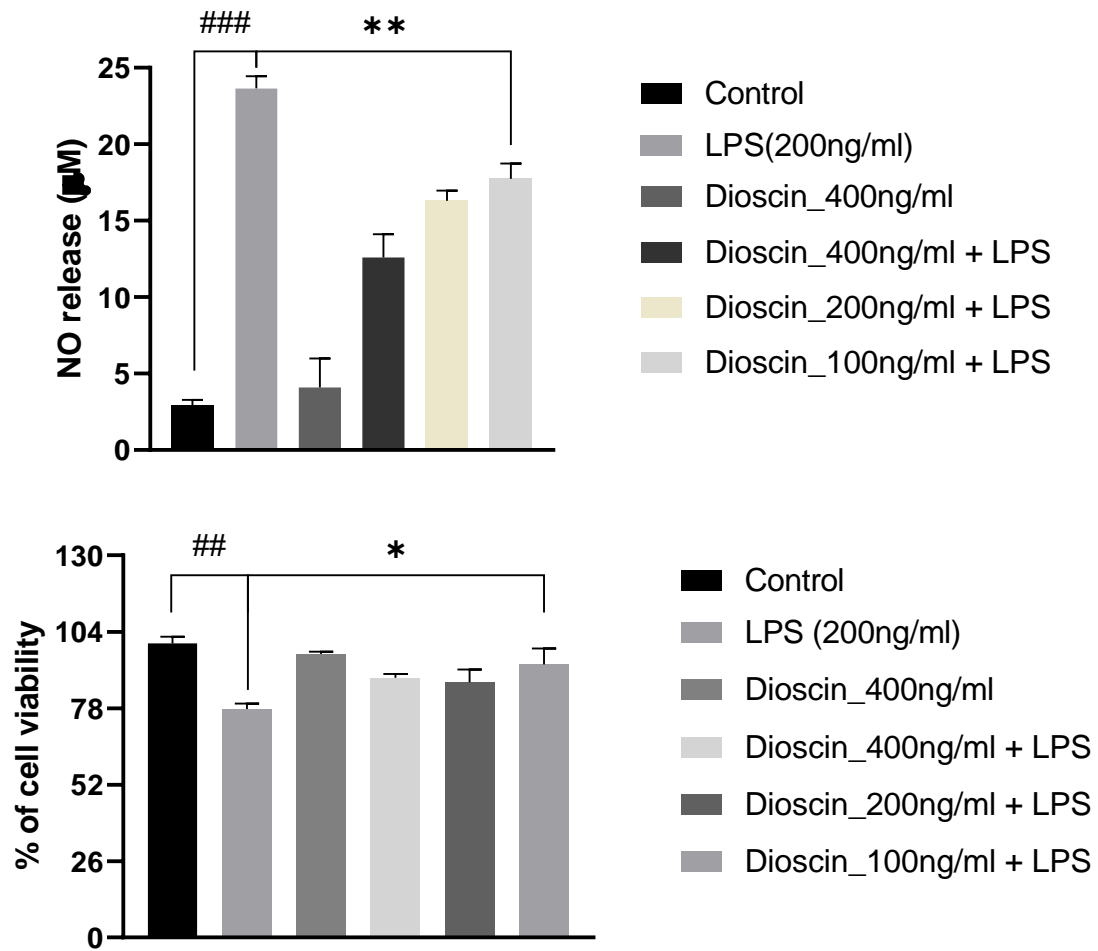

**Figure S2A: Cell viability and NO release from LPS-treated BV-2 cells after dioscin treatment at 24 h.** BV-2 cells were co-treated (LPS and dioscin) or non-treated for 24 h, LPS-activated microglial cells released NO and decreased viability.  $n=3$ ; ### $p<0.001$ , ## $p<0.01$  compared between non-treated (control) vs LPS, and \*\* $p<0.01$ , \* $p<0.05$  compared between dioscin vs LPS, statistical analysis was done using one-way ANOVA.

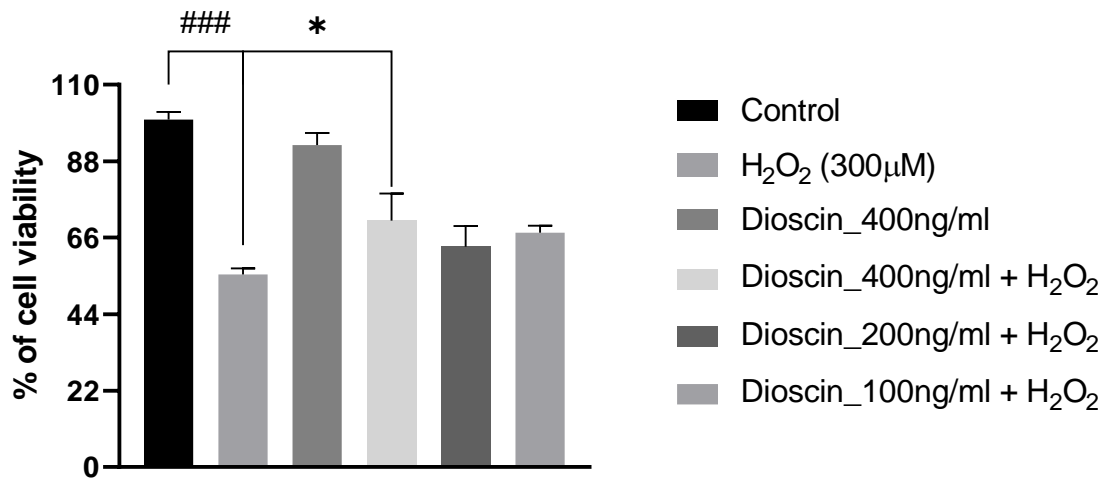

**Figure S2B: Cell viability of H<sub>2</sub>O<sub>2</sub>-treated PC12 cells after Dioscin treatment at 24 h.** For the cell viability, PC12 cells were either co-treated (H<sub>2</sub>O<sub>2</sub> and dioscin) or non-treated for 24 h; n=3, ###p<0.001 compared between control vs H<sub>2</sub>O<sub>2</sub> and \*p<0.05 compared between H<sub>2</sub>O<sub>2</sub> vs dioscin, statistical analysis was done by one-way ANOVA.

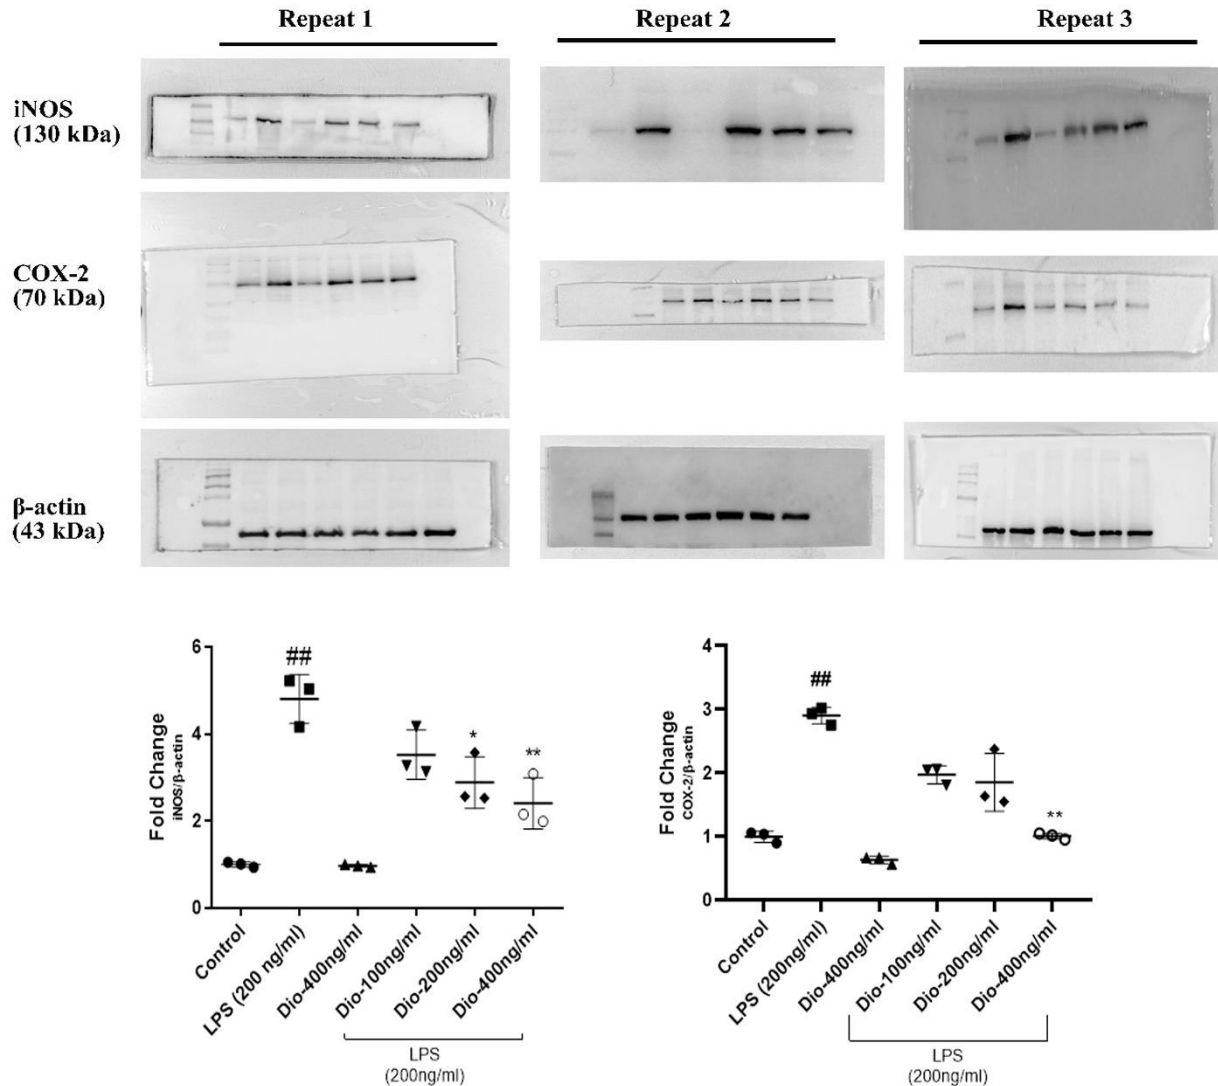

**Figure S3: Inflammatory biomarkers regulated by Dioscin against LPS-induced in BV-2 microglial cells at 24 h.** BV-2 cells were pre-treated (dioscin) for 2 h prior to incubation with LPS (200 ng/ml) or non-treated for 24 h, LPS-activated microglial cells increasing iNOS and COX-2 expression. n=3; ###p<0.001, ##p<0.01 compared between non-treated (control) vs LPS, and \*\*p<0.01, \*p<0.05 compared between dioscin vs LPS, statistical analysis was done using one-way ANOVA.

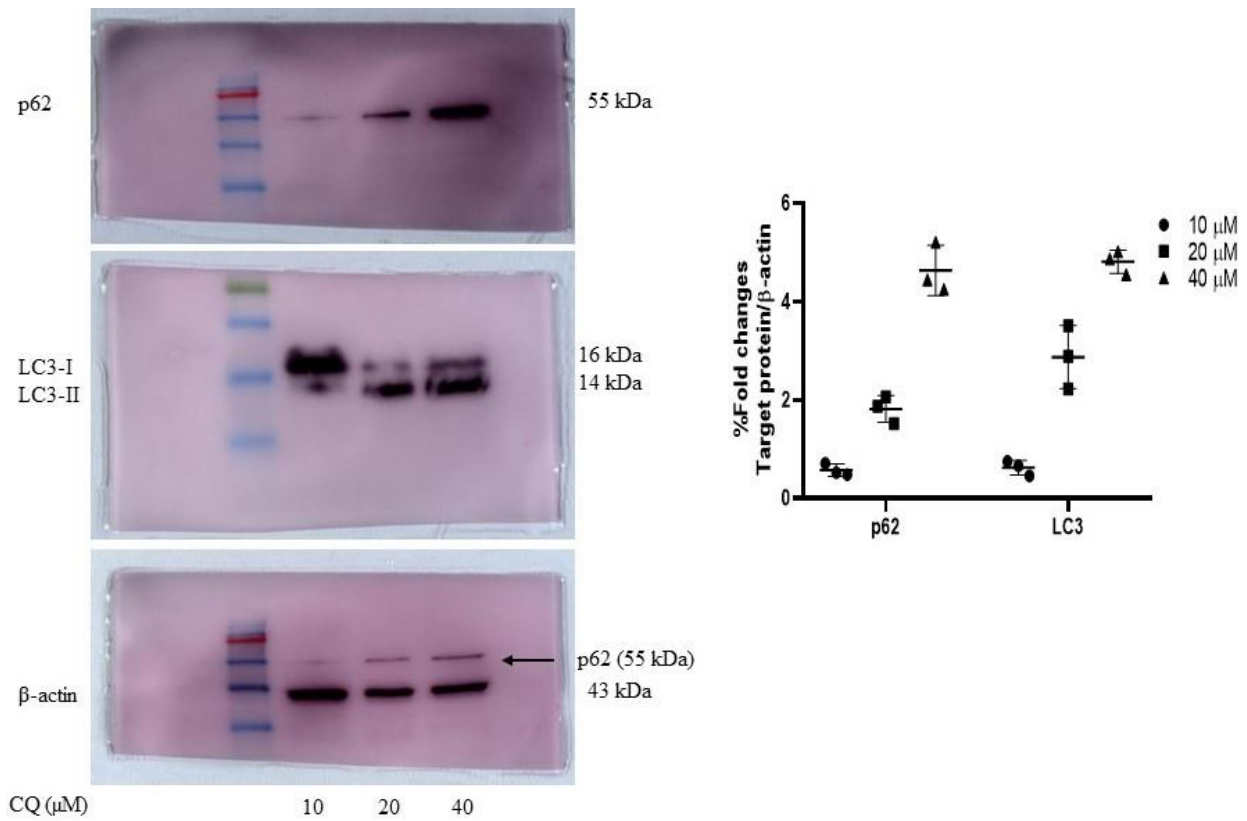

**Figure S4: Dose-dependent autophagic impairment by CQ in SH-SY5Y cells at 24 h.** For dose determination of CQ, SH-SY5Y cells were treated with different doses of CQ for 24 h and proteins were tested via WB for LC3 and p62 expression; n=3, expression of target proteins were neutralized against β-actin, no statistical analysis performed.

**Original blots below are containing proteins per lane as mentioned in the main manuscript.**

Sample full blots of cropped images

Figure 3.

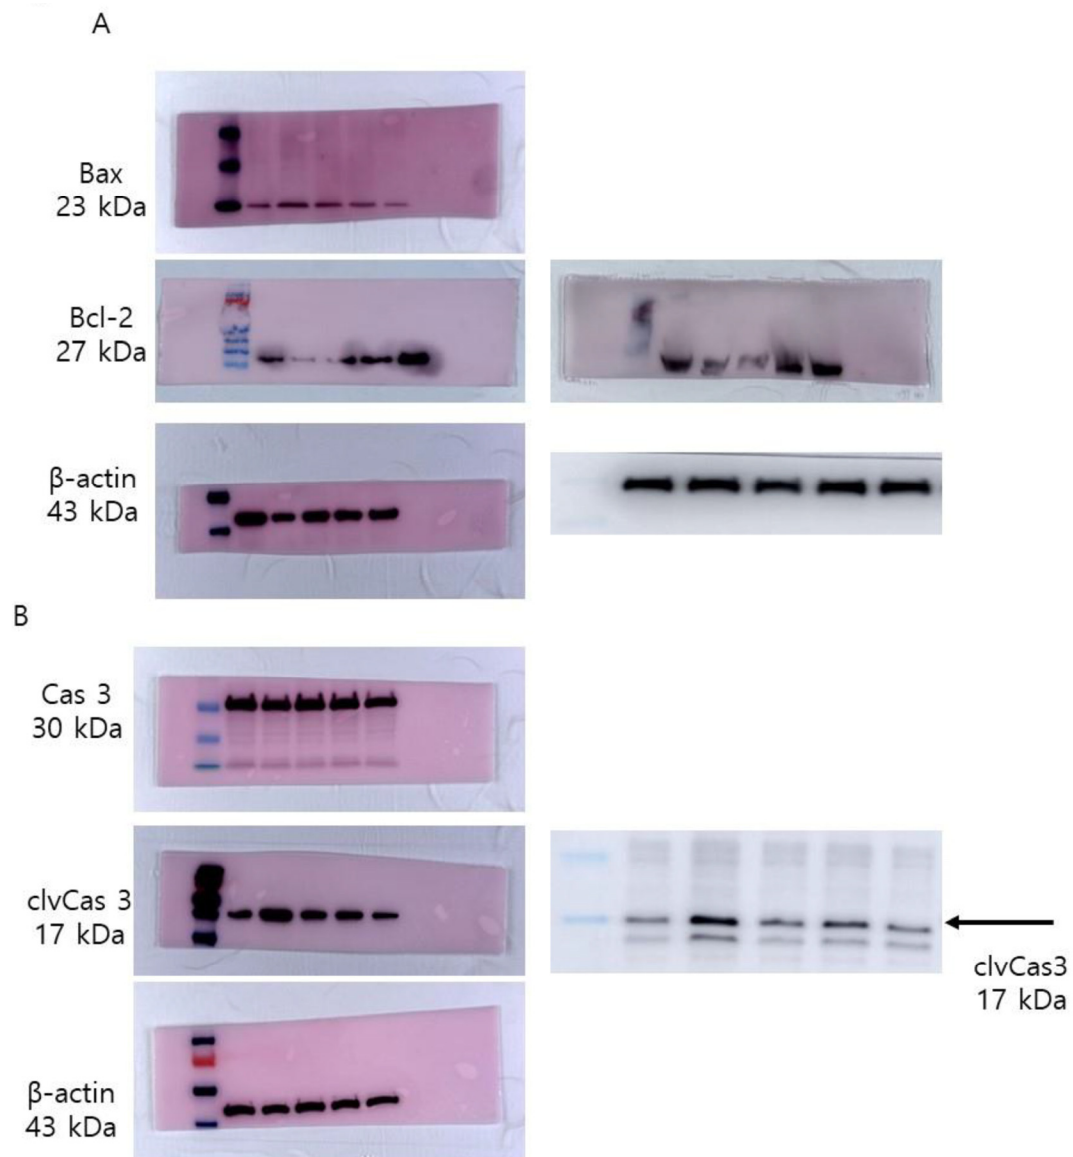

Sample full blots of Cas3/clvCas3

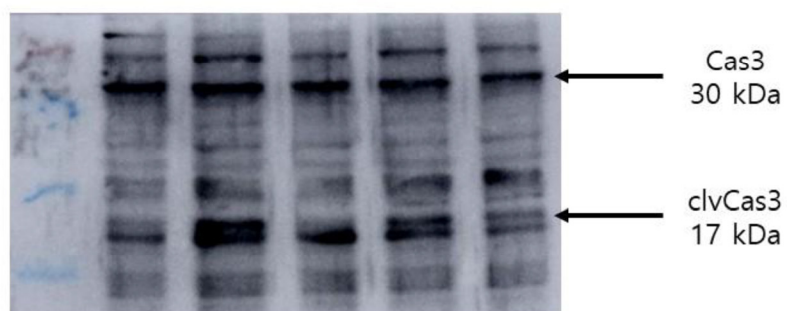

Sample full blots of cropped images

Figure 4.

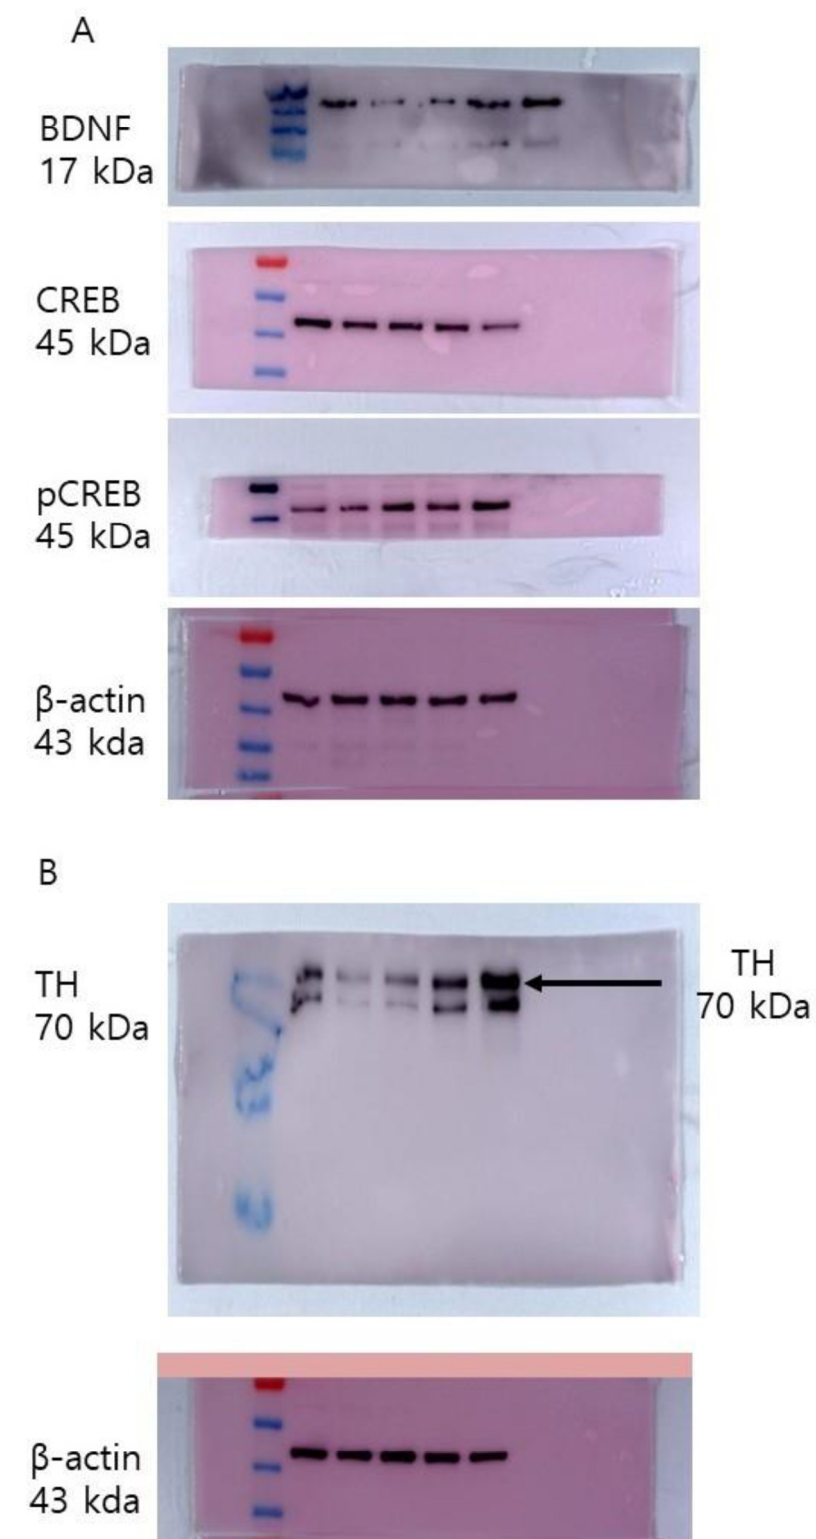

Sample full blots of cropped images

Figure 5.

A

ATG5  
55 kDa

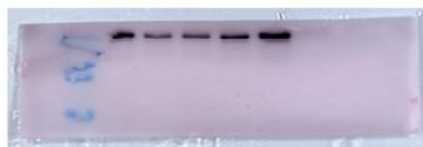

P62  
55 kDa

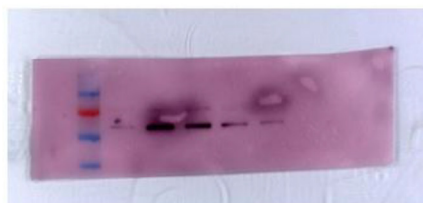

$\beta$ -actin  
43 kDa

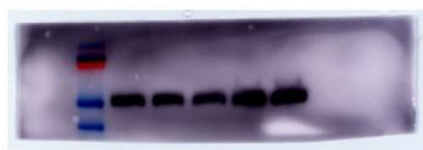

B

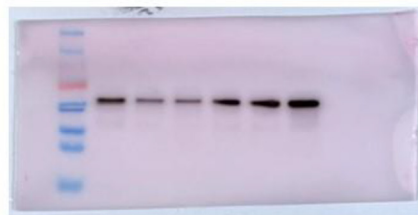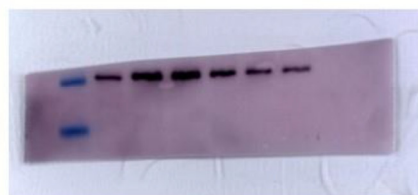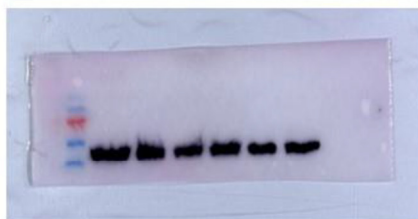

Fig. 6

LC3  
16-14 kDa

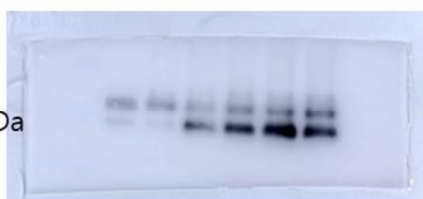

$\beta$ -actin  
43 kDa

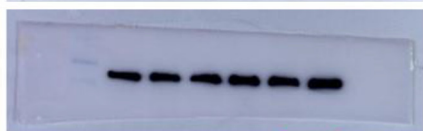

Both lane are same  
(Dio-400 ng/ml)

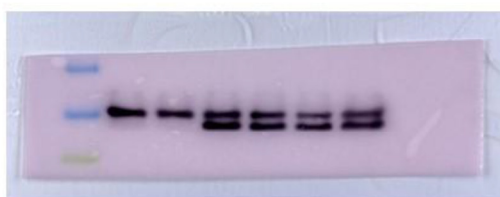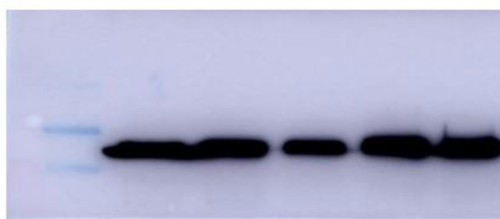

Supplement: s1 [file s1]
